# Supplementary material for: Identification of murine gammaherpesvirus 68 miRNA-mRNA hybrids reveals miRNA target conservation among gammaherpesviruses including host translation and protein modification machinery
Source: PubMed Central journal article supplement (PMC6687095; doi:10.1371/journal.ppat.1007843), 2019-08-08

Figure S1

LATENCY

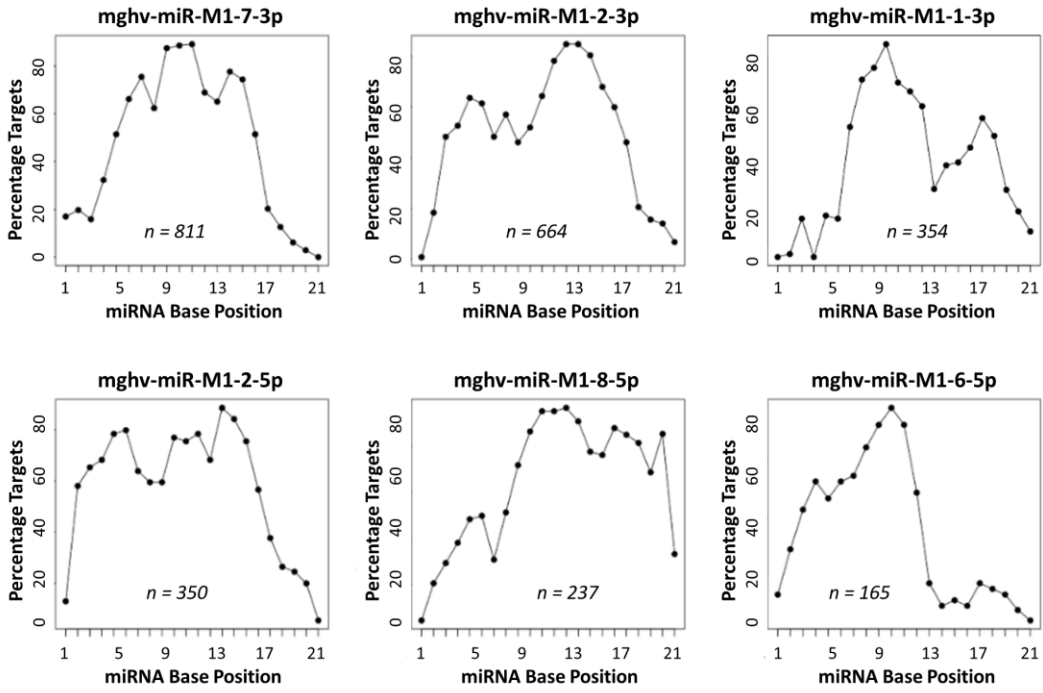

Supplement: ppat.1007843.s001.pdf [file ppat.1007843.s001.pdf]
