# Supplementary material for: Identification of murine gammaherpesvirus 68 miRNA-mRNA hybrids reveals miRNA target conservation among gammaherpesviruses including host translation and protein modification machinery
Source: PubMed Central journal article supplement (PMC6687095; doi:10.1371/journal.ppat.1007843), 2019-08-08
Supplement: ppat.1007843.s006.pdf [file ppat.1007843.s006.pdf]

Table S1

Sequences of primers used for luciferase vector cloning.

| Target                    | Sense                                                                                | Antisense                                                                                   |
|---------------------------|--------------------------------------------------------------------------------------|---------------------------------------------------------------------------------------------|
| Arid1a Target Region      | 5'-ATCGCCGTGTAATTCTAGTTGTTTATGCAGAATCCACCCCTTGA-3'                                   | 5'-AGACTCGAGGCTAGCCGAGCTCGTTTCGTTGTAGGTTCCACACAGGATA-3'                                     |
| Arid1a Target Site        | 5'-CTATGCAAAAACACCTCAGAATCCAGTTTACCCTGTGCTGT-3'                                      | 5'-CTAGACAGCACAGGGTAAACTGGATTCTGAGGTGGTTTTGCATAGAGCT-3'                                     |
| Arid1a Mutant Target Site | 5'-CTATGCAAAAACACCTCAGAATCCATCGGACCTGTGCTGT-3'                                       | 5'-CTAGACAGCACAGGGTCCGATGGATTCTGAGGTGGTTTTGCATAGAGCT-3'                                     |
| Ctstl Target Region       | 5'-ATCGCCGTGTAATTCTAGTTGTTTGGGTATGGAAGCTACATCAAA-3'                                  | 5'-AGACTCGAGGCTAGCCGAGCTCGTTTATGGACACTGAGGTGAAATC-3'                                        |
| Ctstl Target Site         | 5'-CTCAGCTTAAAAGTACCAAAACCCCTATTGAGT-3'                                              | 5'-CTAGACTCAATAAGGGTTTGGTCAGTTTAAAGTGACAGCT-3'                                              |
| Ctstl Mutant Target Site  | 5'-CTCAGCTTAAAAGTACCAAAACCCCTATTGAGGT-3'                                             | 5'-CTAGACCTCATAAGGGTTTGGTCAGTTTAAAGTGAGAGCT-3'                                              |
| Ewsr1 Target Region       | 5'-ATCGCCGTGTAATTCTAGTTGTTTCACTGCTACAGTACCACAA-3'                                    | 5'-AGACTCGAGGCTAGCCGAGCTCGTTTCCAGACTCCTGCCATAAAC-3'                                         |
| Ewsr1 Target Site         | 5'-CCAGTCACCCGACCTCCATCTTATCCTCT-3'                                                  | 5'-CTAGAGAGGATAAGATGGAGGTGCGGTGACTGGAGCT-3'                                                 |
| Ewsr1 Mutant Target Site  | 5'-CCAGTCACCCGAAAGCCATCTTATCCTCT-3'                                                  | 5'-CTAGAGAGGATAAGATGGCTTTGCGGTGACTGGAGCT-3'                                                 |
| Fus Target Region         | 5'-ATCGCCGTGTAATTCTAGTTGTTTTCGGTCTGCTGGAACCTTGT-3'                                   | 5'-AGACTCGAGGCTAGCCGAGCTCGTTTGTGACCATAACCTCCACTCTG-3'                                       |
| Fus Target Site           | 5'-CACGACTATACCAACAAGCAACTCAAAGCTAT-3'                                               | 5'-CTAGATAGCTTTGAGTTGCTTTGGTGGTATAGTCGTGAGCT-3'                                             |
| Fus Mutant Target Site    | 5'-CACGACTATACCAACAAGCGGACCAAAGCTAT-3'                                               | 5'-CTAGATAGCTTTGGTCCGCTTTGGGTATAGTCGTGAGCT-3'                                               |
| Ifitm3 Target Region      | 5'-ATCGCCGTGTAATTCTAGTTGTTTAGAGCAGTTTATCAAGCCA-3'                                    | 5'-AGACTCGAGGCTAGCCGAGCTCGTTTCCGGAATCCTCTAATTAAGTGTGAAG-3'                                  |
| Ifitm3 Target Site        | 5'-CCTCCGACCATGAACCACACTTCTCAAT-3'                                                   | 5'-CTAGATTGAGAAGTGTGGTTCATGGTGCAGGAGGAGCT-3'                                                |
| Ifitm3 Mutant Target Site | 5'-CCTCCGACCATGAAGTGAAGGACTT-3'                                                      | 5'-CTAGAAGTCCCTCACTTCTATGGTGCAGGAGGAGCT-3'                                                  |
| Phc3 Target Region        | 5'-ATCGCCGTGTAATTCTAGTTGTTTCTCACAGAAATGGCTCACAA-3'                                   | 5'-AGACTCGAGGCTAGCCGAGCTCGTTTGGAGGAGACACCCTACAGA-3'                                         |
| Phc3 Target Site          | 5'-CATTCTCTTCAATCCACCTCCTAAAGTTTCCCATCATCAGCTGCTATTAT-3'                             | 5'-CTAGATAATAGCAGCTGATGATGGGAAACTTTAGGAGTGGTGAATGAAGAGGAATGAGCT-3'                          |
| Phc3 Mutant Target Site   | 5'-CATTCTCTTCAATCACGGATCCTAAAGTTTCCCATCATCAGCTGCTATTAT-3'                            | 5'-CTAGAAATAGCAGCTGATGATGGGAAACTTTAGGATCCCGTGAATGAAGAGGAATGAGCT-3'                          |
| Foxj3 Target Region       | 5'-ATCGCCGTGTAATTCTAGTTGTTTACAGCATGGCTTGATGAATTTAC-3'                                | 5'-AGACTCGAGGCTAGCCGAGCTCGTTTAAAGTATGTACACATCACCCCTTCA-3'                                   |
| Foxj3 Target Site         | 5'-CTAGAGACTTGGGGTAAGGACTAACAAACATACATACACAGATGT-3'                                  | 5'-CTAGACATCTGTATGTATGTTTGTAGTCTTACCCCAAGTCTCTAGAGCT-3'                                     |
| Kdm5b Target Region       | 5'-ATCGCCGTGTAATTCTAGTTGTTTAGGAGACTCTGAGGATGAA-3'                                    | 5'-AGACTCGAGGCTAGCCGAGCTCGTTTGCAACTCCAATACCTTCGTAATC-3'                                     |
| Kdm5b Target Site         | 5'-CCTGTACACGGTCTATTCTATTCTTATGGAT-3'                                                | 5'-CTAGATCCCATAGGAATAGAAATAGCACCGTGTACAGAGCT-3'                                             |
| Trp53inp1 Target Region   | 5'-ATCGCCGTGTAATTCTAGTTGTTTCGACGCTACCTCAGCAC-3'                                      | 5'-AGACTCGAGGCTAGCCGAGCTCGTTTACTGAAGGAAGCAGGAATCAC-3'                                       |
| Trp53inp1 Target Site     | 5'-CAAACACTGTGCACCTTAATCTCTCGTGAATTCTCGGGTCCAAAGGAACTCCAGTACCAGATGATCTGATGCCGCTCT-3' | 5'-CTAGAAAGCAGGATACGAGATACATCGGTGACTGGATTCTTGGCACCCGAGAAATCCACGAGAGATTAAGTGCACAGTGTGAGCT-3' |
