# Supplementary material for: Identification of murine gammaherpesvirus 68 miRNA-mRNA hybrids reveals miRNA target conservation among gammaherpesviruses including host translation and protein modification machinery
Source: PubMed Central journal article supplement (PMC6687095; doi:10.1371/journal.ppat.1007843), 2019-08-08
Supplement: ppat.1007843.s007.pdf [file ppat.1007843.s007.pdf]

**Table S2****Sequences of primers used for qRT-PCR analyses.**

| <b>Gene</b>      | <b>Sense Primer</b>         | <b>Antisense Primer</b>     |
|------------------|-----------------------------|-----------------------------|
| <b>Arid1a</b>    | 5'-TGAACCTACAACGCCCTGAC-3'  | 5'-GCCGCTGCAGCTAAAGGTTA-3'  |
| <b>Ctsl</b>      | 5'-GTGGACTGTTCTCACGCTCA-3'  | 5'-TCCGAGTCCAGACCTCCATT-3'  |
| <b>Ewsr1</b>     | 5'-AGGGGAAGAGGGGATTGA-3'    | 5'-GAAGCCACCTCGCTCTCCAG-3'  |
| <b>Fus</b>       | 5'-GTAAGGGCTTCAGTTTGTGGC-3' | 5'-TGGCTCCCAAGTTCTCACAA-3'  |
| <b>Ifitm3</b>    | 5'-CTGAACATCAGCACCTTGGTC-3' | 5'-AGTGTGAAGTTTTGAGCGTT-3'  |
| <b>Phc3</b>      | 5'-GATGTCGGCATCTCCTCCAG-3'  | 5'-ACCTGGCCCTGGGATAGAAT-3'  |
| <b>Foxj3</b>     | 5'-CAGTGCCACAGGTAGTAATC-3'  | 5'-GGTAAACCATGCGGTCTATG-3'  |
| <b>Kdm5b</b>     | 5'-CCAGTGTGTGGAGCATTATC-3'  | 5'-CGTACCACAACGTCTAATAC-3'  |
| <b>Trp53inp1</b> | 5'-GGTCTCAGTGAGGCGAGTTG-3'  | 5'-CATTCTGTGCCCGTGAGTC-3'   |
| <b>Gapdh</b>     | 5'-CATGGCCTCCGTTCCTA-3'     | 5'-CCTGCTTACCACCTTCTTGAT-3' |
