# Supplementary material for: Identification of murine gammaherpesvirus 68 miRNA-mRNA hybrids reveals miRNA target conservation among gammaherpesviruses including host translation and protein modification machinery
Source: PubMed Central journal article supplement (PMC6687095; doi:10.1371/journal.ppat.1007843), 2019-08-08
Supplement: ppat.1007843.s008.pdf [file ppat.1007843.s008.pdf]

**Table S3**

Number of reads and hybrids identified within biological replicates and individual infection groups.

| <b>Lytic</b>                     |                    |                    |                    |              |
|----------------------------------|--------------------|--------------------|--------------------|--------------|
|                                  | <b>Replicate 1</b> | <b>Replicate 2</b> | <b>Replicate 3</b> | <b>Total</b> |
| <b>Total Number of Reads</b>     | 33,155,072         | 18,657,088         | 24,443,598         | 76,255,758   |
| <b>Total Number of Hybrids</b>   | 75,222             | 145,353            | 133,142            | 353,717      |
| <b>Total miRNA Hybrids</b>       | 31,277             | 67,120             | 57,984             | 156,381      |
| <b>Total Host miRNA Hybrids</b>  | 26,946             | 59,127             | 50,501             | 136,574      |
| <b>Total Viral miRNA Hybrids</b> | 4,331              | 7,993              | 7,483              | 19,807       |

| <b>Reactivation</b>              |                    |                    |                    |              |
|----------------------------------|--------------------|--------------------|--------------------|--------------|
|                                  | <b>Replicate 1</b> | <b>Replicate 2</b> | <b>Replicate 3</b> | <b>Total</b> |
| <b>Total Number of Reads</b>     | 36,040,560         | 17,794,998         | 20,190,940         | 74,026,498   |
| <b>Total Number of Hybrids</b>   | 129,172            | 83,977             | 113,026            | 326,175      |
| <b>Total miRNA Hybrids</b>       | 43,425             | 25,936             | 39,812             | 109,173      |
| <b>Total Host miRNA Hybrids</b>  | 36,476             | 21,801             | 33,980             | 92,257       |
| <b>Total Viral miRNA Hybrids</b> | 6,949              | 4,135              | 5,832              | 16,916       |

| <b>Latency</b>                   |                    |                    |                    |              |
|----------------------------------|--------------------|--------------------|--------------------|--------------|
|                                  | <b>Replicate 1</b> | <b>Replicate 2</b> | <b>Replicate 3</b> | <b>Total</b> |
| <b>Total Number of Reads</b>     | 9,038,009          | 6,467,044          | 8,322,503          | 23,827,556   |
| <b>Total Number of Hybrids</b>   | 20,906             | 18,403             | 24,934             | 64,243       |
| <b>Total miRNA Hybrids</b>       | 8,146              | 9,100              | 11,945             | 29,191       |
| <b>Total Host miRNA Hybrids</b>  | 7,302              | 8,108              | 10,629             | 26,039       |
| <b>Total Viral miRNA Hybrids</b> | 844                | 992                | 1,316              | 3,152        |
