# Supplementary material for: Identification of murine gammaherpesvirus 68 miRNA-mRNA hybrids reveals miRNA target conservation among gammaherpesviruses including host translation and protein modification machinery
Source: PubMed Central journal article supplement (PMC6687095; doi:10.1371/journal.ppat.1007843), 2019-08-08
Supplement: ppat.1007843.s009.pdf [file ppat.1007843.s009.pdf]

**Table S4**

**Binding characteristics of MHV68 miRNA-host mRNA hybrids selected for validation.**

| Transcript | miRNA | Binding Sites | Number of Interactions | Region Targeted | Seed <sup>*</sup> binding | 3' Binding <sup>+</sup> | Visual Representation of Binding <sup>^</sup>                         | EBV Target? | KSHV Target? |
|------------|-------|---------------|------------------------|-----------------|---------------------------|-------------------------|-----------------------------------------------------------------------|-------------|--------------|
| Arid1a     | 6-3p  | 1             | 130                    | 3' UTR          | seed 7m1                  | strong                  | UGAAACUGUG...UGAGGUGGUUU<br>             <br>CAUUUGACCUAAGACUCCACAAA  | ✓           | ✓            |
| Cts1       | 8-5p  | 1             | 112                    | 3' UTR          | other                     | strong                  | CACUCACUGGGGUUGGUC<br>         <br>GAGUUAUCCCAAACCAG                  | ✓           |              |
| Ewsr1      | 7-5p  | 1             | 91                     | CDS             | seed 7                    | moderate                | AAAGGUGGAGGUGCGUAACCU<br>     <br>AUUCUACCUCCAGCCACU                  | ✓           | ✓            |
| Fus        | 5-5p  | 1             | 26                     | CDS             | seed 6                    | moderate                | AGAGUUGAGAU.C.GGGUCGUCU<br>     <br>ACUCAACGAAACCAUUAUCA              | ✓           | ✓            |
| Ifitm3     | 7-5p  | 2             | 4                      | 5' UTR-<br>CDS  | seed 7                    | moderate                | AAAG.GUGGA...GGUGCGUAACC<br>         <br>CUUCACACCAAGUACCAGCCUC       | ✓           |              |
| Phc3       | 6-3p  | 1             | 5                      | CDS             | seed 6                    | strong                  | UGAAACUGUGGAGGUGGUUU<br>             <br>CCUUUGAAAUCCUCCACCACDU       | ✓           | ✓            |
| Foxj3      | 12-3p | 2             | 5                      | 3' UTR          | other                     | strong                  | UUUGGUGGGAGUCCU.ACCCCUU<br>               <br>CAAAACA...UCAGGAUUGGGUU | ✓           | ✓            |
| Kdm5b      | 1-3p  | 3             | 71                     | 3' UTR          | seed 7                    | weak                    | UAGAAUUGC...CGUACUCCUUU<br>         <br>ATCUUUAUCGUGGCACAU            | ✓           | ✓            |
| Trp53inp1  | 5-5p  | 1             | 5                      | 5' UTR          | other                     | moderate                | AGAGUUGAGAU.C.GGGTCGUC<br>           <br>GCUCUCUAUUUCA.CGUG           |             |              |

\* Indicates the complementarity within the miRNA seed sequence (miRNA nt 2-8): "seed 6" indicates complementarity of 6 consecutive nt within the seed sequence, "seed 7" indicates complementarity of all 7 nt, "seed 7m1" indicates 1 mismatch within the 7 nt seed, "other" indicates complementarity to less than 6 nt.

<sup>+</sup> Indicates the extent of complementarity within the 3' portion of the miRNA (those nts downstream of the seed sequence).

<sup>^</sup> Top strand is miRNA sequence, bottom strand is mRNA target sequence. Vertical lines between nucleotides indicates base pairing and dashed lines represent G:U wobble pairing. Dots between nucleotides represent a stretch of nucleotides on the opposing side which contains a bulge.
