# Supplementary material for: Identification of murine gammaherpesvirus 68 miRNA-mRNA hybrids reveals miRNA target conservation among gammaherpesviruses including host translation and protein modification machinery
Source: PLOS journal article supplement (doi:10.1371/journal.ppat.1007843), 2019-08-08

**Figure S4**

**MHV68**

2 of 3 replicates

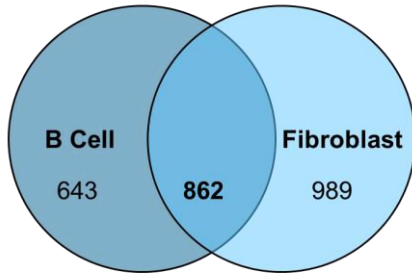

Supplement: S4 (10.1371/journal.ppat.1007843.s004) [file journal.ppat.1007843.s004]
